# Supplementary material
Source: Research Square preprint supplement (doi:10.21203/rs.3.rs-9077989/v1)
Supplement: Supplementary file 1 [file 0f093d199a0b9b0c08b83095.docx]

| **Theme** | **Subtheme** | **Coding units** |
| --- | --- | --- |
| Parental challenges in addressing poor appetite in children in Greater Bay Area | Parenting pressure | Children’s development (e.g. height, nutrition, psychology) |
| Work-childcare conflict | Own career development (e.g. dual-career lifestyle) |
| Knowledge barriers | Insufficient health literacy resources |
| Unreliable online information (e.g conflicts between Chinese medicine and western medicine) |
|  | | |
| Pediatric *Tuina* treatment experience | Intervention selection factors | Chinese medicine credibility (e.g based on culture, medical condition) |
| Pediatric *Tuina* advantages (rapid onset; holistic intervention; treatment flexibility; non-invasive; non-drug) |
| Child acceptance rate (e.g no pain, accompany of parents) |
| Potential effects | Appetite improvement: Food intake increases, Eating behavior enhancement |
| Emotional regulation enhancement |
| Immune function improvement |
| Implementation barriers | Practitioner Competency Variation |
| Limited medical accessibility |
| Inadequate treatment follow-up |
| Insufficient doctor-patient communication |
| Financial constraints |
|  | | |
| Parents’ expectations for optimization | Medical service enhancement | Treatment environment improvement (e.g. avoid cross-infection) |
| Treatment protocol improvement (e.g. follow-up mechanism, individualized prescription) |
| Chinese medicine practitioner-patient communication improvement |
| Family support optimization | Home-based pediatric *tuina* guidance provision |
| Health education provision |
| Social collaboration refinement | Institutional coordination mechanism (family, healthcare, and educational institutions) |
| Healthcare resource allocation optimization |
