# Supplementary material
Source: Research Square preprint supplement (doi:10.21203/rs.3.rs-9077989/v1)
Supplement: Supplementary file 2 [file 15be342ae65a2f7c50a62ee4.docx]

**Parental Perspectives on Pediatric *Tuina* for Poor Appetite in Children: A Qualitative Study in the Greater Bay Area of China**

**Name of authors**: Shu-Cheng CHEN, PhD1#

Bo-Qian CHEN, PhD2#

Min-Ru WU, MA1

Wing-Fai YEUNG, PhD1

Chen TANG, MA2

Juan-Juan ZHUANG, MA2

Qiu-Zhi LIU, BA2

Xuan ZHANG, PhD3*

Bing YE, MA2*

*Corresponding Author

#These authors contributed equally to this work.

**Name of department**: 1 School of Nursing, the Hong Kong Polytechnic University, Hong Kong SAR, China; Research Center for Chinese Medicine Innovation, 2 Shenzhen Traditional Chinese Medicine Hospital, Guangdong, China; 3Affiliated Hospital of Shandong University of Traditional Chinese Medicine, Shandong, China.

***Corresponding Author**: Dr. Xuan ZHANG, Attending Doctor, Affiliated Hospital of Shandong University of Traditional Chinese Medicine; No. 16369, Jingshi Road, Lixia District, Jinan, Shandong, China.

E-mail: zhangzhizu0606@163.com

Telephone: +86 18364165917

Dr. Bing YE, Professor of Treatment, Shenzhen Traditional Chinese Medicine Hospital; 1 Fuhua Road, Futian District, Shenzhen, China

E-mail: yb197481@126.com

Telephone: +86 13168700361

**Abstract**

***Background***: Poor appetite in young children impacts their development and family well-being. While pediatric *tuina* shows promise as a treatment for appetite improvement, parental experiences and implementation challenges remain unexplored in the Greater Bay Area of China.

***Methods***: This qualitative study employed focus group interviews with 13 parents whose children (aged 3-6 years), presenting with poor appetite (characterized by consistently eating less than age-appropriate portions and requiring prolonged feeding time) for at least 6 months, received pediatric *tuina* for at least 3 months. Data were collected through semi-structured interviews and analyzed using thematic analysis.

***Results***: Three main themes emerged: (1) parental challenges in managing children's poor appetite, including parenting pressure, work-childcare conflicts, and knowledge barriers; (2) pediatric *tuina* treatment experiences, highlighting intervention selection factors, potential effects on appetite improvement, emotional regulation, and immune function, and implementation barriers such as variable practitioner competency and limited access; and (3) parents' expectations for optimization, emphasizing the need for enhanced medical services, family support, and institutional collaboration.

***Conclusion***: Pediatric *tuina* shows potential benefits for children with poor appetite in China's Greater Bay Area, improving appetite, emotional regulation, and immune function. However, barriers include practitioner competency gaps, limited specialist access, and insufficient public education. Enhanced professional training, medical services, public awareness campaigns, and institutional support are needed to optimize treatment delivery.

***Keywords***: Pediatric *tuina*, poor appetite in children, traditional Chinese medicine, qualitative study, Greater Bay Area

**1. Introduction**

**1.1 Pediatric functional anorexia**

Poor appetite in children manifests as persistent appetite suppression, diminished food intake, and occasionally complete food refusal, predominantly affecting children aged 3-6 year(1). This prevalent condition accounts for approximately 20-35% of pediatric clinical consultations (2, 3). The etiology is multifactorial, encompassing inappropriate feeding practices, psychological factors, micronutrient deficiencies, hypothalamic dysfunction, gastrointestinal disorders, dysregulation of appetite-mediating hormones, and alterations in gut microbiota composition (4). Protracted poor appetite may lead to malnutrition, growth retardation, compromised immune function, impaired growth velocity, increased susceptibility to secondary infections, and adverse psychological sequelae, thereby imposing considerable burden on families and healthcare systems (5-10). Currently, there exists a notable gap in specific pharmacological treatments for pediatric poor appetite in clinical practice. Conventional management strategies primarily address symptomatic manifestations. Western medical approaches incorporate nutritional supplementation, appetite-enhancing medications, and behavioral modification techniques (11, 12); however, these interventions frequently demonstrate inadequate long-term efficacy and are associated with substantial recurrence rates. Pharmacological agents may temporarily augment appetite but present potential adverse effect profiles with prolonged administration (13, 14). Complementary approaches, such as traditional Chinese medicine (TCM) interventions, including pediatric *tuina*, acupuncture, and herbal medicine, aim to rectify underlying physiological imbalances while minimizing adverse effects (15-17).

**1.2 Pediatric *tuina* for poor appetite in children**

Pediatric *tuina,* also called TCM pediatric massage, is a specialized TCM external therapy applying specific manipulations to acupoints in children for therapeutic and preventive purposes. It has been widely used in pediatric care in China and other East Asian regions. In TCM practice, pediatric tuina is traditionally applied based on syndrome differentiation and individualized treatment principles adapted to children’s physiological characteristics (18). Several modern research suggests pediatric *tuina* also functions through neuroimmunological pathways, increasing serum ghrelin levels, modulating vagal tone, improving gastrointestinal motility, and regulating appetite-related hormones (19, 20). Clinical applications have expanded to address various childhood conditions, with efficacy documented through clinical trials for diarrhea (21), anorexia (22), and constipation (23). Within TCM theory, poor appetite in children is commonly associated with dysfunction of the spleen and stomach systems and may be related to factors such as improper feeding, constitutional weakness, or emotional disturbances. Treatment principles focus on strengthening spleen function and stimulating appetite. Therapeutic protocols are individualized based on the child's constitutional state, etiological factors, and condition classification (24). Core techniques include spinal pinching, spleen meridian tonification, abdominal rubbing, *Banmen* manipulation, and inner *Bagua* stimulation (25). Previous clinical studies have reported potential benefits of these techniques in improving appetite-related symptoms and digestive function in children, although further high-quality research is still needed to confirm their efficacy and mechanisms.

**1.3 Research gap**

Evidence regarding pediatric tuina for poor appetite and related gastrointestinal symptoms in children has increased in recent years. One randomized controlled trial involving 94 children reported improved appetite-related outcomes among participants receiving pediatric tuina combined with herbal medicine compared with herbal medicine alone (26). A systematic review of 28 randomized controlled trials (n=2,650) suggested that pediatric tuina may be associated with improved outcomes for childhood feeding difficulties compared with Western medications and herbal medicine, including improvements in food intake–related parameters(16). Another systematic review analyzing 10 randomized controlled trials (n=1,336) in pediatric functional dyspepsia reported lower symptom recurrence rates in children receiving tuina-based interventions compared with controls (27). Existing research has significant methodological limitations: inadequate blinding, heterogeneous controls, and non-standardized outcome measures. Studies typically feature brief interventions without sufficient follow-up, conducted at single sites that fail to account for contextual variables across diverse settings. The absence of qualitative research exploring parent-child experiences limits our understanding of treatment acceptability, beneficial outcomes, and implementation challenges of pediatric *tuina* for poor appetite in children. This gap restricts our ability to assess multidimensional effects beyond quantitative metrics, hindering evidence-based protocol development for clinical practice and research. The Greater Bay Area's advanced economic infrastructure and sophisticated healthcare ecosystem provide optimal conditions for rigorous clinical investigation, while its population demonstrates heightened awareness of pediatric nutritional disorders. The region's intensely competitive educational climate generates academic pressures that potentially induce stress-mediated appetite dysregulation through population-specific mechanisms. Additionally, the distinctive subtropical climate influences dietary behaviors that may interact uniquely with traditional therapeutic modalities, establishing an exceptionally valuable research context. To address these knowledge gaps, therefore, we designed a qualitative focus group interview study to explore parental experiences of pediatric *tuina* for poor appetite in children in the Greater Bay Area. This study specifically aims to investigate parents' perceptions of treatment challenges, effectiveness factors, and implementation barriers, while identifying potential improvements to clinical services and family support systems.

**2. Methods**

This qualitative investigation employed a focus group methodology to explore parental perspectives with ethical approval from the Hong Kong Polytechnic University (HSEARS20250101001). Reporting followed the Consolidated Criteria for Reporting Qualitative Research guidelines (28).

***2.1 Study Setting and Population***

Study participants were recruited through advertisements at the online platform of Pediatric *Tuina* Clinic of Shenzhen Traditional Chinese Medicine Hospital, which served patients throughout the Greater Bay Area. Study participants who met the eligibility criteria were selected through random sampling and invited to participate on a voluntary basis. All focus group interviews were conducted face-to-face at Shenzhen Traditional Chinese Medicine Hospital, which were determined based on group members' preferences and availability. Prior to participation, written informed consent was obtained from all participants. The study enrolled parents of children with poor appetite. Poor appetite assessment referenced criteria adapted from "Practical Pediatrics" (7th edition, Hu Yamei, People's Medical Publishing House, 2002), including decreased food intake (characterized by consistently eating less than age-appropriate portions and requiring prolonged feeding time) for at least 6 months. Associated symptoms included abdominal distention, gastrointestinal discomfort, nausea, emesis, halitosis, altered bowel habits, and malodorous stools. Inclusion criteria were: 1) children who underwent pediatric *tuina* therapy for poor appetite for at least 3 months, 2) children aged 3-6 years regardless of gender, 3) parents with proficient Mandarin communication skills, and 4) parents who provided written informed consent. Exclusion criteria encompassed: 1) children with less than three months of pediatric tuina treatment, 2) children diagnosed with gastrointestinal disorders, severe rickets, anemia, or conditions affecting major organ systems, 3) children whose poor appetite was primarily attributed to psychological factors or medication side effects, and 4) parents who did not provide written consent. The sample size was determined by data saturation principles. Following grounded theory principles, recruitment concluded once data saturation occurred, marked by the absence of emerging novel insights in subsequent interviews (29).

***2.2 Data collection***

The focus group discussions were guided by a semi-structured interview protocol developed through review of pertinent literature and expert consultation, including input from TCM practitioners (BY and XZ) and a qualitative research specialist (WFY). This protocol encompassed eight exploratory questions presented in Table 1. The primary investigator (SCC) facilitated the discussions, while a research assistant (XZ) maintained field notes and managed recording devices. Both facilitators underwent comprehensive training conducted by the qualitative research specialist (WFY), who possesses dual expertise in TCM clinical practice and qualitative research methodologies. Each session began with facilitator introductions, an overview of research objectives and procedures, and assurances regarding confidentiality protocols. The moderator clarified questions as needed and encouraged interactive dialogue through appropriate prompts, maintaining topical relevance while preserving neutrality. Participation remained strictly voluntary, with interviews conducted exclusively in the presence of participants and research personnel. Though audio recordings were essential for data collection, personal identifiers were omitted from all records. As compensation for their valuable contributions, participants received specialized pediatric *tuina* training delivered by an experienced TCM practitioner.

***2.3 Data analysis***

Interview recordings underwent verbatim transcription via Feishu software, followed by researcher-conducted verification against original audio. Simplified Chinese was preserved in all transcripts, while participant identities were protected through randomly assigned codes. Confidentiality measures included removal of personal identifiers from all documentation and secure elimination of audio recordings following transcription. Transcript analysis utilized hierarchical thematic coding following a systematic seven-phase template approach: (1) thorough examination of transcripts including notation of paralinguistic elements; (2) identification and extraction of relevant statements; (3) conceptual coding to establish meaning units; (4) thematic clustering of coded elements; (5) comprehensive narrative synthesis; (6) distillation of core conceptual structures; and (7) validation through participant feedback on preliminary findings (30). Initial transcription and coding were performed by the primary author (SCC), with a second review conducted by an additional researcher (XZ). The principal investigator (BY) served as arbiter in resolving analytical discrepancies. MS Word facilitated the coding infrastructure, complemented by descriptive statistical analysis of demographic profiles (31). Research findings are organized into conceptual frameworks illustrated by verbatim excerpts, with participants referenced exclusively through alphanumeric codes.

***2.4 Methodological rigor***

Our methodological approach employed rigorous procedures to ensure scientific validity. Lincoln and Guba's four-dimensional trustworthiness framework guided our quality assurance strategy (32, 33). Credibility was strengthened through the development of a semi-structured interview protocol refined via dual collaborative sessions and subsequently field-tested during a single participant in a pilot interview, allowing for critical adjustments to guide questions prior to full implementation. The participant selection process employed purposive sampling techniques to capture multifaceted perspectives relevant to intervention implementation. Regarding transferability, we assessed data richness through saturation principles, continuing recruitment until marginal informational returns were observed, which occurred following the third interview session. To establish dependability, dual-researcher independent coding procedures were instituted, supplemented by recurring consultative meetings with a qualitative research specialist. For confirmability, participant validation procedures involved distributing analytical frameworks, coding structures, and representative quotations to interviewees for verification and feedback, thereby minimizing interpretive bias and ensuring authentic representation of participant experiences in the intervention design.

**3. Results**

Between February and April 2025, data collection comprised three group discussions in Mandarin. Group discussions ranged from 87 to 128 minutes (mean=108 minutes). From an initial pool of 29 invited parents, 13 ultimately participated in the study. Interview configurations included three to five participants per session, with no pre-existing acquaintanceships among participants. Thematic structures emerged preliminarily by the second interview and underwent subsequent refinement through the third session.

***3.1 Sample profile***

Interviews included thirteen parents of children with poor appetite, with a gender distribution of 10 females (76.9%) and 3 males (23.1%). Parental participants averaged 36.33 years of age (SD = 7.68), while their children's mean age was 42.69 months (SD = 26.69). Table 2 presents comprehensive demographic characteristics of the study participants.

***3.2 Major themes***

Three themes regarding the participants' experiences with their children receiving pediatric *tuina* treatment for poor appetite in children were identified: (1) parental challenges in addressing poor appetite in children in Greater Bay Area, (2) pediatric *tuina* treatment experience, and (3) parents' expectations for optimization. The specific subthemes under each theme were described. Table 3 presents the code structure.

*3.2.1 Parental challenges in addressing poor appetite in children in Greater Bay Area*

This theme encompasses three subthemes: (a) parenting pressure related to children's development, (b) work-childcare conflict, and (c) knowledge barriers including insufficient health literacy resources and unreliable online information.

*3.2.1.1 Parenting pressure*

Parents expressed significant concerns about their children's physical development due to poor appetite. They reported observing slower growth rates, changes in physical appearance, and signs of potential malnutrition. One mother noted, "*His growth has been slow in the past six months. He's two years old now, but while other kids his age are around 93-94cm tall, he's only 88cm* (M000). Another parent described observable changes in their child's appearance: "*There have been some changes in his appearance. For instance, his hair is getting thinner, turning yellowish, and looks kind of frizzy and standing up. Because of his food aversion, or maybe stomach discomfort, he doesn't like to eat, which might have led to some malnutrition*" (M013). Parents also reported experiencing psychological pressure when feeding their children, which often created negative feeding dynamics. As one parent explained, "*When it comes to meat and vegetables, if they're a bit tough to chew, he either refuses to eat or eats very slowly. This makes us parents anxious, and when we get anxious, we rush him, which creates pressure on him - it becomes a whole negative cycle*" (M012). This vicious cycle of parental anxiety and child resistance to eating was commonly reported, highlighting the emotional burden on families dealing with children’s poor appetite.

*3.2.1.2 Work-childcare conflict*

Modern lifestyles in the Greater Bay Area, particularly dual-career arrangements, created additional challenges for parents in managing their children's eating routines. The demanding work schedules often conflicted with optimal childcare practices, especially regarding meal preparation and feeding. One mother described the morning rush: "*We need to be at work by 8am, which means leaving home at 7am, so there's really no time (for a proper breakfast). We also need to drop the child off at daycare in the morning. I now feel this is a major issue*" (M013). This time constraint was identified as a significant contributor to inadequate feeding practices, as parents struggled to balance career responsibilities with their children's nutritional needs.

*3.2.1.3 Knowledge barriers*

Parents frequently mentioned the challenge of insufficient health literacy resources, particularly for first-time parents. Without proper guidance, many felt lost in addressing their children's eating issues. One mother shared her experience: "*Being a first-time mother, I didn't know much, and no one told me what to do. Without access to scientific parenting resources, I could only blindly search online by myself*" (M013). This lack of reliable information sources left parents vulnerable to confusion and misinformation. Adding to this challenge was the prevalence of contradictory information online, especially regarding nutritional advice from different medical paradigms. Parents reported feeling overwhelmed by conflicting recommendations: "*When I look online, everyone says different things - Traditional Chinese Medicine practitioners say you shouldn't eat this, while Western doctors say it's fine... It really gets confusing*" (M010). This inconsistency between traditional Chinese and Western medical advice created additional uncertainty for parents trying to make informed decisions about their children's diet and health management.

*3.2.2 Pediatric tuina treatment experience*

The second theme captures parents' experiences with pediatric *tuina* as a treatment modality for their children's poor appetite. This theme encompasses three major subthemes: (a) intervention selection factors, (b) potential effects, and (c) implementation barriers encountered during the treatment process.

*3.2.2.1 Intervention selection factors*

Parents selected pediatric tuina based on their trust in Traditional Chinese Medicine and the treatment's practical advantages. One parent explained their preference for Traditional Chinese Medicine for long-term improvement, while acknowledging Western medicine's role in addressing acute symptoms: "*I tend to trust (Traditional Chinese Medicine). I believe Western medicine works better for severe symptoms, but if you want long-term stable improvement, you need Traditional Chinese Medicine*" (M008). The non-invasive nature of pediatric *tuina* made it particularly appealing compared to herbal medicine, with one mother noting its immediate effects: "*I think it has an immediate effect. Right after the pediatric tuina session, he suddenly becomes refreshed and energetic, and then he has a good appetite*" (M013). Another parent highlighted the holistic benefits and gentle approach: "*First of all, it's difficult to get children to take Chinese herbal medicine. As parents, we definitely prefer this non-invasive approach. Secondly, I think pediatric tuina provides a holistic intervention for the whole body - like when it regulates the spleen and stomach function, it's actually helping to regulate the entire body system, which is beneficial*" (M012). Children's positive reception of the treatment was another important factor, as illustrated by a parent who shared: "*Sometimes he really enjoys the pediatric tuina, haha. At home, his grandfather helps him with it*" (M001). The gentle techniques used were described as particularly suitable for children: "*Pure pediatric tuina is completely painless because it only involves skin contact, just gentle rubbing rather than forceful pressing. Our baby accepts it quite well. I think for feeding difficulties, the technique used is quite gentle*" (M004).

*3.2.2.2 Potential effects*

Parents observed several beneficial outcomes from pediatric *tuina* treatment, including improvements in appetite, emotional regulation, and immune function. After a few weeks of consistent treatment, one parent noticed their previously non-communicative child began actively expressing food preferences: "*It took about 2-3 weeks (to start seeing results) with pediatric tuina. Before, when we asked him what he wanted to eat, he would stay silent for ages. Now he actively tells us 'I want this' or 'I want that'*" (M006). Beyond eating behaviors, parents reported enhancements in their children's temperament and ability to self-regulate emotions, with one mother observing: "*I can tell his temper has improved - he doesn't burst into crying and fussing over little things anymore... I can see he's now able to play contentedly by himself*" (M013). Some parents even attributed improvements in their children's overall constitution and immunity to the treatment, with one parent describing: "*Initially, we saw Western doctors, but her constitution kept getting weaker. Then we started trying pediatric tuina... Her frail condition is now a thing of the past. Pediatric tuina has truly enhanced her immunity, boosted her vital energy, and strengthened her ability to fight off viruses and external pathogens*" (M009).

*3.2.2.3 Implementation barriers*

Despite the perceived benefits, parents encountered several obstacles in implementing pediatric *tuina* treatment. Variation in practitioner competency significantly affected outcomes, with one parent noting: "*The effectiveness of pediatric tuina depends on technique and personal experience. When we went to XXX Traditional Chinese Medicine Hospital (a hospital in Shenzhen, China), it was mostly young practitioners in their twenties, fresh graduates, doing the treatment, and the results weren't really significant*" (M011). Another parent observed differences between senior practitioners and their assistants: "*It's extremely difficult to get an appointment with Dr. XXX (the director of Pediatric tuina Department of a hospital in Shenzhen, China). I've noticed there's a big difference in effectiveness between treatments given by Dr. XXX himself and those by his assistants or students*" (M009). Limited access to qualified practitioners created additional challenges, as appointments with reputable doctors were extremely difficult to secure: "*Dr. XXX (a pediatric tuina practitioner) releases next Wednesday's appointments on Wednesdays. We arrive at 7am, but there are already 30 parents ahead of us. It's extremely difficult (to get an appointment)*" (M009). The continuity of treatment was often compromised by these scheduling difficulties, which one parent identified as particularly problematic: "*Since pediatric tuina for feeding difficulties requires long-term treatment, it sometimes gets interrupted - either because we can't get appointments or due to scheduling conflicts, which affects the continuity of treatment*" (M011). Communication gaps between practitioners and families further hindered the treatment process, with parents reporting that their questions were often met with overly simplistic answers: "*Because every time I come, I always ask the doctor some questions, but he just gives me very simple answers. For example, after completing the treatment today, I asked him what I should pay attention to, and he said 'there's nothing to pay attention to'*" (M003). In addition, financial constraints posed a significant burden for some families: "*The cost is too high - one session plus the registration fee already costs around 100-200 yuan*" (M013).

*3.2.3 Parents' expectations for optimization*

The third theme examines parents' hopes for improving pediatric tuina services. Parents identified three areas where enhancements could be made: (1) medical service enhancement, (2) family support optimization, and (3) social collaboration refinement.

*3.2.3.1 Medical service enhancement*

Parents expressed desires for improvements in treatment environments, particularly regarding infection control. One mother voiced concern about the current setup during flu season: "*In the pediatric tuina clinic, due to the current flu season, many children have multiple cross-infections - flu, mycoplasma, and COVID-19. When children spend half an hour in such an environment for pediatric tuina treatment, cross-infection is very common. I hope there could be a separate treatment room for patients with these cross-infections*" (M009). Treatment protocol improvements were also suggested, with one parent recommending more intensive initial treatment followed by maintenance sessions: "*I hope we could have three consecutive days of pediatric tuina treatment first, and if it works well, then continue with more appointments... There should be a more reasonable scheduling arrangement*" (M002). Others emphasized the need for individualized care plans tailored to each child's unique constitution: "*Every time we come, it's the same routine - like they do the pediatric tuina in exactly the same way... But actually, each child has a different constitution, I think there should be different treatment plans*" (M004). Enhanced practitioner-patient communication was frequently mentioned, with one parent highlighting the knowledge gap: "*The practitioner should communicate with me about my upcoming treatment plan, such as how many sessions I need next week and how we should adjust the frequency of tuina treatments for optimal results.* " (M003).

*3.2.3.2 Family support optimization*

Parents identified needs for better guidance on performing pediatric tuina at home and broader health education to support their children's wellbeing. One parent suggested occasional educational sessions: "*It would be good to have occasional lectures (about pediatric tuina)*" (M013). Another expressed interest in seasonal dietary guidance that would complement the treatment approach: "*I think it would be helpful to have educational information about what to eat in different seasons - what's suitable for spring, what's good for autumn. Since children are quite sensitive and their bodies aren't fully developed, I think this kind of health education would be really useful... Because there's a lot I don't understand, and I want to learn more*" (M013).

*3.2.3.3 Social collaboration refinement*

Parents envisioned broader institutional coordination to support children's health management across different settings. One parent suggested establishing connections between healthcare providers and educational institutions: "*I think it would be good if the hospital could establish some connection with kindergartens, because children spend more time at kindergarten than at home, and teachers also need to know how to take care of them*" (M008). Resource allocation was another concern, with parents hoping for increased staffing to improve access to qualified practitioners: "*I hope the hospital leadership and directors can give more support to Dr. XXX and hire more assistants, so that we parents and our children can have better access to treatment*" (M009).

**4. Discussion**

***4.1 Main fundings***

This study represents the first qualitative research examining pediatric *tuina* for poor appetite in children from the Greater Bay Area, providing deep insights into parental perspectives on this TCM intervention. Through focus groups with 13 parents, we identified three key themes. The first theme revealed challenges parents face: developmental concerns about children’s growth, work-childcare conflicts in the urban environment, and confusion from contradictory health information. The second theme explored treatment experiences, showing parents chose pediatric *tuina* based on trust in TCM and its non-invasive approach, reporting benefits beyond improved appetite (including better emotional regulation and enhanced immunity), while encountering obstacles such as variable practitioner skill, limited access to specialists, and poor communication. The third theme captured parents' suggestions for improvement: clinical enhancements (better environments, individualized protocols, improved communication), family support (home practice guidance, nutritional education), and institutional collaboration (coordination between healthcare and educational institutions, better resource allocation) - providing insights into both the therapeutic potential of pediatric *tuina* and necessary systemic improvements for treatment delivery.

***4.2 Comparisons with previous studies***

Our findings align with several previous studies in multiple aspects. Consistent with previous research, pediatric eating disorders may impact family relationships and daily functioning (34). The effectiveness of pediatric *tuina* in improving children's gastrointestinal function, emotional well-being, and immune system performance corroborates findings from multiple clinical studies(35, 36). An RCT on pediatric *tuina* for attention deficit hyperactivity disorder specifically noted improvements in children's concentration, flexibility, mood, sleep quality, and social functioning through parent-administered pediatric *tuina* during the COVID-19 pandemic(37). The high acceptance rate of pediatric *tuina* among parents and children mirrors previous research highlighting the growing trust in TCM interventions (38). Additionally, our findings regarding the shortage of pediatric medical resources echo nationwide concerns documented in several studies (39). The lack of coordination among family education, school systems, and clinical treatment remains a persistent challenge, as previously identified in the literature(40).

However, some findings diverge from existing literature. Despite being located in the economically advanced Greater Bay Area, parents reported significant difficulties accessing reliable parenting resources and professional knowledge. This contrasts with previous studies suggesting that developed urban areas typically offer abundant educational resources and professional support(41). For instance, research has found that parents in developed regions generally have multiple channels for accessing pediatric healthcare information and professional guidance(42-44). This discrepancy highlights the need for more systematic approaches to resource distribution and knowledge dissemination, particularly in establishing reliable information platforms and professional support networks.

Several surprising findings emerged from our study. The substantial variation in practitioners' skill levels and the extreme scarcity of highly qualified pediatric *tuina* practitioners were unexpected, given the region's economic status. The difficulty in securing appointments with experienced TCM practitioners reveals a severe imbalance between supply and demand. This situation creates a cascade effect where overworked skilled practitioners have limited time for patient communication, potentially compromising treatment experiences. Furthermore, the limitations in transmitting TCM knowledge and techniques present unexpected challenges in scaling up service provision. These findings suggest that even in economically advanced regions, structural issues in healthcare delivery and professional training persist, requiring targeted interventions for improvement.

***4.3 Implications***

Our findings yield several implications across clinical practice, research, healthcare education, and policy development in pediatric *tuina* for poor appetite. For clinical practice, findings necessitate systematic improvements in service delivery through standardized protocols, therapeutic environments, and appointment systems. The demonstrated efficacy in appetite regulation and psychosocial outcomes positions pediatric *tuina* as a viable complementary intervention in pediatric care. For research, findings indicate the need to expand outcome measures beyond appetite indices to include psychosocial parameters and parent-child relationships. Future studies should emphasize long-term follow-up to evaluate the sustained effects of consecutive treatments. For healthcare education, priorities encompass standardized practitioner training protocols and quality assurance mechanisms, supplemented by comprehensive health literacy programs focusing on practical techniques and dietary guidance. Institutional policies should optimize treatment adherence and continuity. For policy development, results support the integration of pediatric *tuina* into mainstream healthcare, with structured parent education programs addressing resource constraints. This approach facilitates home-based interventions while enhancing treatment outcomes through coordinated healthcare delivery systems.

***4.4 Limitations***

This study has several notable limitations. First, the gender distribution of participating parents was imbalanced, with 9 mothers and 4 fathers, which may have introduced gender-specific perspectives in understanding parental experiences and home-based intervention practices (45). Second, while the study provides valuable insights from parents' perspectives, it lacks comprehensive viewpoints from other key stakeholders, like TCM practitioners. Healthcare providers' experiences, perspectives on medical resource allocation, and doctor-patient relationships were not explored, limiting our understanding of the complete healthcare delivery ecosystem (46). Third, although participants were recruited in Shenzhen, representing families from various regions who sought treatment there, the study's scope may not fully capture the circumstances in less economically developed areas of the Greater Bay Area. Healthcare accessibility, resource distribution, and parental experiences might differ significantly in these regions.

**5. Conclusions**

Pediatric *tuina* shows potential effects for poor appetite in children, improving in children's appetite, emotional regulation, and immune function. However, implementation barriers include variable practitioner competency, limited access to specialists, and poor communication. The critical shortage of highly qualified pediatric *tuina* practitioners highlights an urgent need for systematic professional training. Enhanced medical services, improved family support, and strengthened institutional collaboration are needed to optimize treatment delivery in the Greater Bay Area of China.

**Declarations**

**Abbreviations**

TCM: traditional Chinese medicine ; RCT: randomized controlled trials

**Ethics approval and consent to participate**

Ethical approval for the research was granted by the Departmental Research Committee (Ethics approval number: HSEARS20250101001). Participant information sheets and informed consent were obtained prior to face-to-face interviews. All study procedures were carried out in compliance with the Declaration of Helsinki and other applicable guidelines and regulations.

**Consent for publication**

Not Applicable.

**Availability of data and materials**

The original contributions presented in the study are included in the article/supplementary material. Further inquiries can be directed to the corresponding authors.

**Competing interests**

The authors declare that the research was conducted in the absence of any commercial or financial relationships that could be construed as a potential conflict of interest.

**Funding**

The authors declare that no financial support was received for the research, authorship, and/or publication of this article.

**Author contribution**

SCC: Data curation, Formal analysis, Methodology, Writing – original draft. BQC: Investigation, Data curation– original draft. MRW: Data curation– original draft. CT: Data curation– original draft. JJZ: Investigation, Writing– original draft. WFY: Methodology, Writing– original draft. QZL: Conceptualization, Methodology, Writing – review & editing. XZ: Investigation, Formal analysis, Writing, Conceptualization– review & editing. BY: Investigation, Writing, Formal analysis, Conceptualization– review & editing.

1. Medicine CAoTC. Guidelines for the diagnosis and treatment of common diseases in pediatrics [in Chinese]. : Beijing: China Traditional Chinese Medicine Press; 2012 2012-07.

2. Kaymaz N, Bulur N, Yıldırım Ş, Cevizci S, Topaloğlu N, Tekin M, et al. Poor Appetite in School Children: Is It a False Perception of Parents? Journal of Pediatric Research. 2015;2(1):11-6.

3. Ünal F. İştahsız Çocuklara Klinik Yaklaşım. Güncel Pediatri. 2011;9(3):79-84.

4. Ge M, Gao D. Chinese-English edition of pediatric Tuina. Shanghai, China: Shanghai Scientific and Technical Publishers. 2009.

5. Rodríguez L, Cervantes E, Ortiz R. Malnutrition and gastrointestinal and respiratory infections in children: a public health problem. Int J Environ Res Public Health. 2011;8(4):1174-205.

6. Martorell R, Zongrone A. Intergenerational influences on child growth and undernutrition. Paediatr Perinat Epidemiol. 2012;26 Suppl 1:302-14.

7. Ibrahim MK, Zambruni M, Melby CL, Melby PC. Impact of Childhood Malnutrition on Host Defense and Infection. Clin Microbiol Rev. 2017;30(4):919-71.

8. Prado EL, Dewey KG. Nutrition and brain development in early life. Nutr Rev. 2014;72(4):267-84.

9. Bryant-Waugh R, Markham L, Kreipe RE, Walsh BT. Feeding and eating disorders in childhood. Int J Eat Disord. 2010;43(2):98-111.

10. Black MM, Pérez-Escamilla R, Rao SF. Integrating nutrition and child development interventions: scientific basis, evidence of impact, and implementation considerations. Adv Nutr. 2015;6(6):852-9.

11. Williams KE, Field DG, Seiverling L. Food refusal in children: a review of the literature. Res Dev Disabil. 2010;31(3):625-33.

12. Nicely TA, Lane-Loney S, Masciulli E, Hollenbeak CS, Ornstein RM. Prevalence and characteristics of avoidant/restrictive food intake disorder in a cohort of young patients in day treatment for eating disorders. J Eat Disord. 2014;2(1):21.

13. Couturier J, Isserlin L, Norris M, Spettigue W, Brouwers M, Kimber M, et al. Canadian practice guidelines for the treatment of children and adolescents with eating disorders. J Eat Disord. 2020;8:4.

14. Marchand V, Motil KJ. Nutrition support for neurologically impaired children: a clinical report of the North American Society for Pediatric Gastroenterology, Hepatology, and Nutrition. J Pediatr Gastroenterol Nutr. 2006;43(1):123-35.

15. Lee B, Ko MM, Lee SH, Chang GT. Acupuncture for the treatment of childhood anorexia: A systematic review and meta-analysis. Complement Ther Med. 2022;71:102893.

16. Liang SB, Lai BY, Cao HJ, Cai QH, Bai X, Li J, et al. Pediatric tuina for the treatment of anorexia in children under 14 years: a systematic review and meta-analysis of randomized controlled trials. Complement Ther Med. 2020;51:102411.

17. Lee B, Kwon CY, Lee SH, Chang GT. Herbal Medicine for the Treatment of Anorexia in Children: A Systematic Review and Meta-Analysis. Front Pharmacol. 2022;13:839668.

18. Lu T, Yin L, Chen R, Zhang H, Cai J, Li M, et al. Chinese pediatric Tuina on children with acute diarrhea: a randomized sham-controlled trial. Health Qual Life Outcomes. 2021;19(1):4.

19. Chen SC, Fu QW, Zhang QX, Yeung WF. Getting to Know the Effect Theory of Traditional Pediatric Tuina in the View of Modern Medicine in Three Minor Perspectives. Med Acupunct. 2024;36(4):173-7.

20. Zhang X, Guo T, Zhu B, Gao Q, Wang H, Tai X, et al. Pediatric Tuina for promoting growth and development of preterm infants: A protocol for the systematic review of randomized controlled trail. Medicine (Baltimore). 2018;97(18):e0574.

21. Ventura S, Mathieson SR, O'Sullivan MP, O'Toole JM, Livingstone V, Pressler RM, et al. Parent-led massage and sleep EEG for term-born infants: A randomized controlled parallel-group study. Dev Med Child Neurol. 2023;65(10):1395-407.

22. Hui Y, Si-Bin L. Clinical observation on 49 cases of congenital muscular torticollis in children treated with massage using tricolor powder as medium [in Chinese]. . J Chin Med Pediatr. 2021;17(01):85-8.

23. Jingrun W, Qiao Q. Analysis on the value of Chinese medicine pediatric massage in treating anorexia in children [in Chinese]. . Chin J Health Care. 2023;41(22):31-4.

24. Ying-Xia D, Peng Z, Chun-sheng F, Xiao Y. Study on the clinical acupoint selection rules of massage for the treatment of anorexia in children based on complex network [in Chinese]. Shandong J Tradit Chin Med. 2021;40(10):1116-20.

25. Mingche S. .The efficacy of Chinese medicine pediatric massage in the treatment of anorexia in children [in Chinese]. Chin Med Guide. 2024;22(23):151-3.

26. Xie T, Jiang H, Zhang C. Clinical observation of pediatric Tuina plus oral Chinese medication for pediatric anorexia due to spleen failing in transportation. Journal of Acupuncture and Tuina Science. 2022;20(2):119-25.

27. Ha NY, Keum CY, Kim J. Pediatric Tuina for the treatment of functional dyspepsia: A systematic review and meta-analysis of randomized controlled trials. Complement Ther Med. 2025;88:103117.

28. Tong A, Sainsbury P, Craig J. Consolidated criteria for reporting qualitative research (COREQ): a 32-item checklist for interviews and focus groups. Int J Qual Health Care. 2007;19(6):349-57.

29. Morse JM. Critical Analysis of Strategies for Determining Rigor in Qualitative Inquiry. Qual Health Res. 2015;25(9):1212-22.

30. Brooks J, McCluskey S, Turley E, King N. The Utility of Template Analysis in Qualitative Psychology Research. Qual Res Psychol. 2015;12(2):202-22.

31. Kisorio LC, Langley GC. Intensive care nurses' experiences of end-of-life care. Intensive Crit Care Nurs. 2016;33:30-8.

32. Forero R, Nahidi S, De Costa J, Mohsin M, Fitzgerald G, Gibson N, et al. Application of four-dimension criteria to assess rigour of qualitative research in emergency medicine. BMC Health Serv Res. 2018;18(1):120.

33. Lincoln YS. Naturalistic inquiry: sage; 1985.

34. Holtom-Viesel A, Allan S. A systematic review of the literature on family functioning across all eating disorder diagnoses in comparison to control families. Clin Psychol Rev. 2014;34(1):29-43.

35. Wang H, Chen B, Long Q, Yang Q, Mao J, Ma Q, et al. Efficacy of Tui Na in idiopathic constipation in children with cerebral palsy: a randomized controlled clinical trial. Front Pediatr. 2024;12:1503591.

36. Chen SC, Yu J, Wang HS, Wang DD, Sun Y, Cheng HL, et al. Parent-administered pediatric Tuina for attention deficit/hyperactivity disorder symptoms in preschool children: A pilot randomized controlled trial embedded with a process evaluation. Phytomedicine. 2022;102:154191.

37. Chen SC, Cheng HL, Wang DD, Wang S, Yin YH, Suen LK, et al. Experience of parents in delivering pediatric tuina to children with symptoms of attention deficit hyperactivity disorder during the COVID-19 pandemic: qualitative findings from focus group interviews. BMC Complement Med Ther. 2023;23(1):53.

38. Chen SC, Lo KC, Li H, Wong PM, Pang LY, Qin J, et al. Parental Experiences of Administering Pediatric Tuina for Sleep and Appetite in Early School-Aged Children With Attention-Deficit/Hyperactivity Disorder: Qualitative Study in Hong Kong. JMIR Pediatr Parent. 2025;8:e65471.

39. Liu Y, Yang LL, Xu SY, Zhao ZY. Pediatrics in China: challenges and prospects. World J Pediatr. 2018;14(1):1-3.

40. Spain AK, Korfmacher J, McCrae JS. Coordination challenges and promising practices for pediatric healthcare-community partnerships: A multi-site study. J Community Psychol. 2023;51(5):2117-32.

41. Wu F, Chen W, Lin L, Ren X, Qu Y. The balanced allocation of medical and health resources in urban areas of China from the perspective of sustainable development: a case study of Nanjing. Sustainability. 2022;14(11):6707.

42. Park E, Kim H, Steinhoff A. Health-Related Internet Use by Informal Caregivers of Children and Adolescents: An Integrative Literature Review. J Med Internet Res. 2016;18(3):e57.

43. Walsh AM, Hamilton K, White KM, Hyde MK. Use of online health information to manage children's health care: a prospective study investigating parental decisions. BMC Health Serv Res. 2015;15:131.

44. Neill SJ, Jones CH, Lakhanpaul M, Roland DT, Thompson MJ. Parent's information seeking in acute childhood illness: what helps and what hinders decision making? Health Expect. 2015;18(6):3044-56.

45. Hallyburton A, Evarts LA. Gender and online health information seeking: A five survey meta-analysis. Journal of consumer health on the Internet. 2014;18(2):128-42.

46. Coert RMH, Timmis JK, Boorsma A, Pasman WJ. Stakeholder Perspectives on Barriers and Facilitators for the Adoption of Virtual Clinical Trials: Qualitative Study. J Med Internet Res. 2021;23(7):e26813.
