# Supplementary material
Source: Research Square preprint supplement (doi:10.21203/rs.3.rs-9077989/v1)
Supplement: Supplementary file 3 [file 1639c187b21c38b1dfe13c14.pdf]

To Chen Shucheng (School of Nursing)

---

From Leung Yee Man Angela, Chair, Departmental Research Committee

---

Email angela.ym.leung@polyu.edu.hk Date 26-Feb-2025

---

### **Application for Ethical Review for Teaching/Research Involving Human Subjects**

I write to inform you that approval has been given to your application for human subjects ethics review of the following project for a period from 01-Apr-2025 to 31-Oct-2025:

**Project Title:** Experiences and Effects of Pediatric Tuina in Improving Anorexia in Children: A Qualitative Study on Parents

**Department:** School of Nursing

**Principal Investigator:** Chen Shucheng

**Project Start Date:** 01-Apr-2025

**Project type:** Human subjects (non-clinical)

**Reference Number:** HSEARS20250101001

You will be held responsible for the ethical approval granted for the project and the ethical conduct of the personnel involved in the project. In case the Co-PI, if any, has also obtained ethical approval for the project, the Co-PI will also assume the responsibility in respect of the ethical approval (in relation to the areas of expertise of respective Co-PI in accordance with the stipulations given by the approving authority).

You are responsible for informing the PolyU Institutional Review Board in advance of any changes in the proposal or procedures which may affect the validity of this ethical approval.

Leung Yee Man Angela

Chair

Departmental Research Committee (on behalf of PolyU Institutional Review Board)
