# Supplementary material
Source: Research Square preprint supplement (doi:10.21203/rs.3.rs-9077989/v1)
Supplement: Supplementary file 4 [file 6f34499f2723e650f1c4f802.docx]

**Highlights**

• Parents face work conflicts and knowledge gaps for managing children's poor appetite

• Pediatric *tuina* shows benefits for children’s appetite, emotions, and immune function

• Parents value pediatric *tuina's* non-invasive approach and child-friendly techniques

• Barriers include variable practitioner skills and limited access to specialists

• Better clinical environments and individualized protocols are needed
