# Supplementary material
Source: Research Square preprint supplement (doi:10.21203/rs.3.rs-9077989/v1)

Author Agreement Statement

We the undersigned declare that this manuscript is original, has not been published before and is not currently being considered for publication elsewhere.

We confirm that the manuscript has been read and approved by all named authors and that there are no other persons who satisfied the criteria for authorship but are not listed. We further

confirm that the order of authors listed in the manuscript has been approved by all of us.

We understand that the Corresponding Author is the sole contact for the Editorial process.

He/she is responsible for communicating with the other authors about progress, submissions of

revisions and final approval of proofs Signed by all authors as follows:


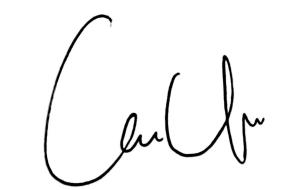


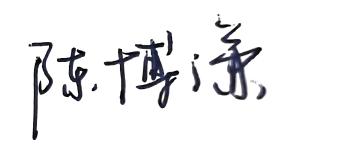

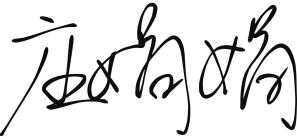

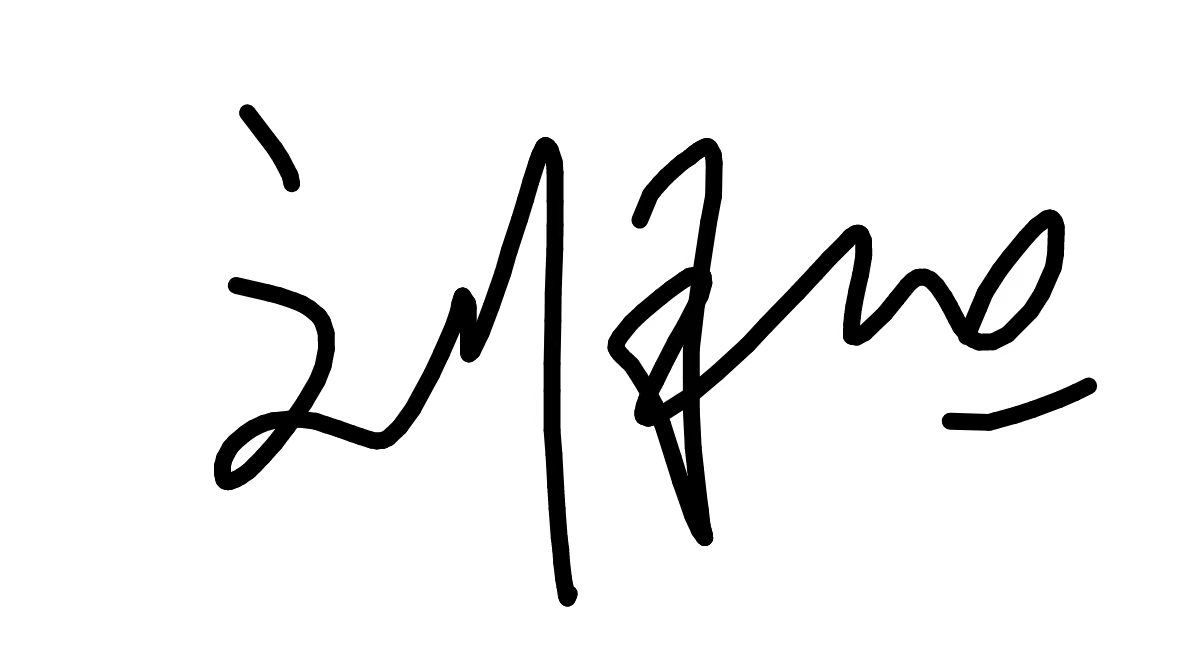


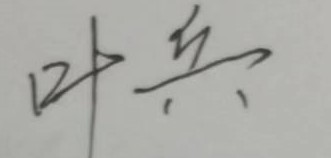

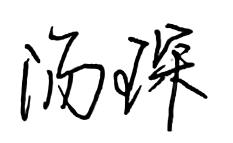

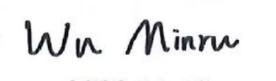

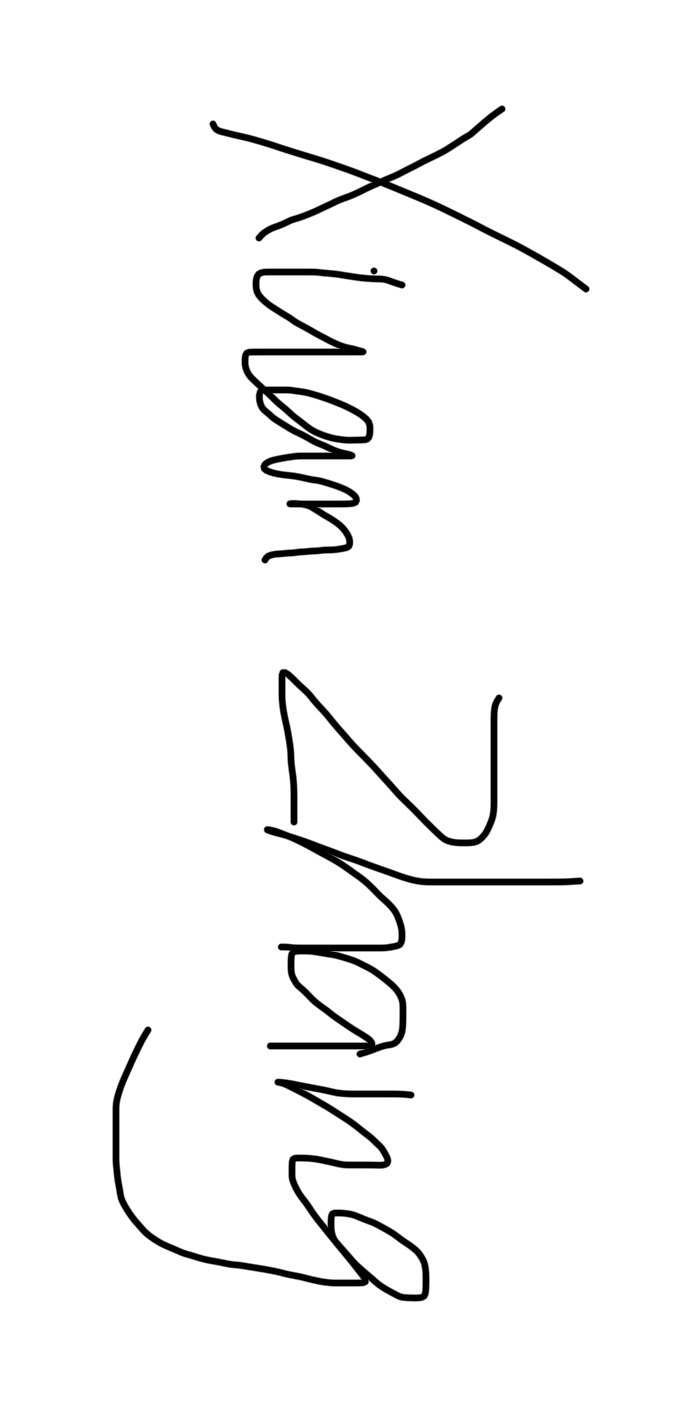

Supplement: Supplementary file 5 [file 87932a3a57c063ac0bd655f9.docx]
