# Supplementary material
Source: Research Square preprint supplement (doi:10.21203/rs.3.rs-9077989/v1)
Supplement: Supplementary file 6 [file e9180078e3d8e5baac9d7b87.docx]

**Table 1. Questions for the semi-structured interview**

| 1. How has your child's anorexia affected both your child's and your own lives? (Probes: Child: learning, psychological, physiological impacts; Parents: parent-child relationship, parental emotions such as anxiety or worry) |
| --- |
| 1. What was your knowledge of pediatric *tuina* before using it for your child's anorexia? What factors led you to learn about and choose pediatric *tuina* to address your child's eating problems? |
| 1. What is your overall experience regarding pediatric *tuina* for treating anorexia? (How long after onset did you choose *tuina*? Did you try other therapies first? How long before noticeable improvements occurred? What specific improvements did you observe?) |
| 1. What advantages do you perceive in using pediatric *tuina* for anorexia? What motivated you to continue with this treatment? |
| 1. What factors might cause you to discontinue pediatric *tuina* for treating anorexia symptoms? |
| 1. Did you learn *tuina* techniques from the doctor during your child's treatment? (If yes: Which specific techniques did you learn? Which do you routinely perform yourself? What difficulties did you encounter regarding pressure, direction, frequency, duration, or effectiveness? If no: What concerns do you have about learning or using these techniques?) |
| 1. After your child's anorexia improved, would you continue using pediatric *tuina* for general health maintenance? In what specific aspects? |
| 1. What improvements would you suggest for the application of pediatric *tuina* in treating childhood anorexia? |

| **Table 2.** Demographic Characteristics of Participants Interviewed | |
| --- | --- |
| Characteristics | N=13 |
| Parents |  |
| Age, y, mean (SD) | 36.33 (7.68) |
| Gender, no. (%) |  |
| Male | 4 (30.77) |
| Female | 9 (69.23) |
| Occupation, no. (%) |  |
| Government employee | 0 (0) |
| Public institution employee | 2 (15.4) |
| Enterprise employee | 6 (46.2) |
| Farmer | 0 (0) |
| Self-employed | 1 (7.7) |
| Freelancer | 4 (30.8) |
| Family monthly income (RMB), no. (%) |  |
| 10k and below | 0 (0) |
| 10k-20k | 4 (30.8) |
| 20k-30k | 2 (15.4) |
| >30k | 5 (38.5) |
| Unwilling to disclose | 2 (15.4) |
| Children |  |
| Age, m, mean (SD) | 42.69 (26.69) |
| Gender, no. (%) |  |
| Male | 10 (76.90) |
| Female | 3 (23.1) |
| Age at poor appetite onset, m, mean (SD) | 22.23（21.39） |
| Duration of poor appetite symptoms, m, mean (SD) | 19.62（22.14） |
| Treatment duration, m, mean (SD) | 15.62 (22.17) |

NOTES: One of the parents was unwilling to disclose their age.
